# Supplementary material for: SETD1A protects from senescence through regulation of the mitotic gene expression program
Source: PubMed Central journal article supplement (PMC6599037; doi:10.1038/s41467-019-10786-w), 2019-06-28
Supplement: 41467_2019_10786_MOESM2_ESM.pdf [file 41467_2019_10786_MOESM2_ESM.pdf]

## Reporting Summary

Nature Research wishes to improve the reproducibility of the work that we publish. This form provides structure for consistency and transparency in reporting. For further information on Nature Research policies, see [Authors & Referees](#) and the [Editorial Policy Checklist](#).

### Statistics

For all statistical analyses, confirm that the following items are present in the figure legend, table legend, main text, or Methods section.

n/a Confirmed

- |                                     |                                     |                                                                                                                                                                                                                                                            |
|-------------------------------------|-------------------------------------|------------------------------------------------------------------------------------------------------------------------------------------------------------------------------------------------------------------------------------------------------------|
| <input type="checkbox"/>            | <input checked="" type="checkbox"/> | The exact sample size ( $n$ ) for each experimental group/condition, given as a discrete number and unit of measurement                                                                                                                                    |
| <input type="checkbox"/>            | <input checked="" type="checkbox"/> | A statement on whether measurements were taken from distinct samples or whether the same sample was measured repeatedly                                                                                                                                    |
| <input type="checkbox"/>            | <input checked="" type="checkbox"/> | The statistical test(s) used AND whether they are one- or two-sided<br><i>Only common tests should be described solely by name; describe more complex techniques in the Methods section.</i>                                                               |
| <input type="checkbox"/>            | <input checked="" type="checkbox"/> | A description of all covariates tested                                                                                                                                                                                                                     |
| <input type="checkbox"/>            | <input checked="" type="checkbox"/> | A description of any assumptions or corrections, such as tests of normality and adjustment for multiple comparisons                                                                                                                                        |
| <input type="checkbox"/>            | <input checked="" type="checkbox"/> | A full description of the statistical parameters including central tendency (e.g. means) or other basic estimates (e.g. regression coefficient) AND variation (e.g. standard deviation) or associated estimates of uncertainty (e.g. confidence intervals) |
| <input type="checkbox"/>            | <input checked="" type="checkbox"/> | For null hypothesis testing, the test statistic (e.g. $F$ , $t$ , $r$ ) with confidence intervals, effect sizes, degrees of freedom and $P$ value noted<br><i>Give <math>P</math> values as exact values whenever suitable.</i>                            |
| <input checked="" type="checkbox"/> | <input type="checkbox"/>            | For Bayesian analysis, information on the choice of priors and Markov chain Monte Carlo settings                                                                                                                                                           |
| <input checked="" type="checkbox"/> | <input type="checkbox"/>            | For hierarchical and complex designs, identification of the appropriate level for tests and full reporting of outcomes                                                                                                                                     |
| <input type="checkbox"/>            | <input checked="" type="checkbox"/> | Estimates of effect sizes (e.g. Cohen's $d$ , Pearson's $r$ ), indicating how they were calculated                                                                                                                                                         |

*Our web collection on [statistics for biologists](#) contains articles on many of the points above.*

### Software and code

Policy information about [availability of computer code](#)

Data collection

FACS data was collected using FlowJo(v10), Mass Spectrometry data collected by Thermo Fisher Tune and Xcalibur software in conjunction with a SEQUEST related analysis platform provided by the Gygi Lab.

Data analysis

FlowJo(v10) was used for FACS analysis. ELK was used for MassSpec analysis. Survival analysis was done using the KM plotter web server. Cytoscape (v3.5.1) and STRING (v10.5) were used to annotate and visualize protein-protein interactions. ChIP-seq SOLiD reads were analyzed using the LifeScope (v2.5) software package. BAM files were subjected to peak calling using MACS2, which generated narrowPeak files. R/Bioconductor packages "ChIPseeker" and "clusterProfiler" were used to annotate peak sites near known human genes. Functional enrichments were generated using the DAVID webserver. Geneset enrichment analysis for Biological process GO terms was performed using the BROAD pre-ranked GSEA tool (v2.2.2). Heatmaps were generated using R. T-tests were performed using Excel or SPSS.

For manuscripts utilizing custom algorithms or software that are central to the research but not yet described in published literature, software must be made available to editors/reviewers. We strongly encourage code deposition in a community repository (e.g. GitHub). See the Nature Research [guidelines for submitting code & software](#) for further information.

### Data

Policy information about [availability of data](#)

All manuscripts must include a [data availability statement](#). This statement should provide the following information, where applicable:

- Accession codes, unique identifiers, or web links for publicly available datasets
- A list of figures that have associated raw data
- A description of any restrictions on data availability

ChIP sequencing data have been deposited in the NCBI Gene Expression Omnibus database under accession code GSE 117427.

Microarray data have been deposited in the NCBI Gene

Expression Omnibus database under accession code GSE 71498.  
All relevant data are available from the authors.

## Field-specific reporting

Please select the one below that is the best fit for your research. If you are not sure, read the appropriate sections before making your selection.

Life sciences  Behavioural & social sciences  Ecological, evolutionary & environmental sciences

For a reference copy of the document with all sections, see [nature.com/documents/nr-reporting-summary-flat.pdf](https://www.nature.com/documents/nr-reporting-summary-flat.pdf)

## Life sciences study design

All studies must disclose on these points even when the disclosure is negative.

Sample size

Data exclusions

Replication

Randomization

Blinding

## Reporting for specific materials, systems and methods

We require information from authors about some types of materials, experimental systems and methods used in many studies. Here, indicate whether each material, system or method listed is relevant to your study. If you are not sure if a list item applies to your research, read the appropriate section before selecting a response.

### Materials & experimental systems

n/a  Involved in the study

Antibodies

Eukaryotic cell lines

Palaeontology

Animals and other organisms

Human research participants

Clinical data

### Methods

n/a  Involved in the study

ChIP-seq

Flow cytometry

MRI-based neuroimaging

## Antibodies

Antibodies used

Validation

## Eukaryotic cell lines

Policy information about [cell lines](#)

Cell line source(s)

Authentication

Mycoplasma contamination

Commonly misidentified lines (See [ICLAC](#) register)

## ChIP-seq

### Data deposition

- Confirm that both raw and final processed data have been deposited in a public database such as [GEO](#).
- Confirm that you have deposited or provided access to graph files (e.g. BED files) for the called peaks.

#### Data access links

*May remain private before publication.*

<https://www.ncbi.nlm.nih.gov/geo/query/acc.cgi?acc=GSE117427>  
reviewer token: uhsfqactxyhnan

#### Files in database submission

BAM files: shGFP\_H3K4me3\_1.bam  
shGFP\_H3K4me3\_2.bam  
shGFP\_H3K4me3\_3.bam  
shSETD1A\_H3K4me3\_1.bam  
shSETD1A\_H3K4me3\_2.bam  
shSETD1A\_H3K4me3\_3.bam  
NarrowPeak files: shGFP\_H3K4me3\_1\_peaks.narrowPeak  
shGFP\_H3K4me3\_2\_peaks.narrowPeak  
shGFP\_H3K4me3\_3\_peaks.narrowPeak  
shSETD1A\_H3K4me3\_1\_peaks.narrowPeak  
shSETD1A\_H3K4me3\_2\_peaks.narrowPeak  
shSETD1A\_H3K4me3\_3\_peaks.narrowPeak

#### Genome browser session

(e.g. [UCSC](#))

*Provide a link to an anonymized genome browser session for "Initial submission" and "Revised version" documents only, to enable peer review. Write "no longer applicable" for "Final submission" documents.*

### Methodology

#### Replicates

3

#### Sequencing depth

All reads are 50bp single-end. Below are the total read and uniquely mapped reads for each BAM file.  
shGFP\_H3K4me3\_1.bam Total = ; Unique = 14355019  
shGFP\_H3K4me3\_2.bam Total = ; Unique = 13811050  
shGFP\_H3K4me3\_3.bam Total = ; Unique = 15886035  
shSETD1A\_H3K4me3\_1.bam Total = ; Unique = 12140155  
shSETD1A\_H3K4me3\_2.bam Total = ; Unique = 15633379  
shSETD1A\_H3K4me3\_3.bam Total = ; Unique = 15415484

#### Antibodies

rabbit anti-Histone H3 mono-methyl K4 antibody (Abcam)

#### Peak calling parameters

The mapping software (ABI LifeScope) used default parameters. It takes XQC and generate UNIQUELY mapped BAMS. Peaks were called using MACS2 the following parameters: macs2 callpeak -t CHIP.bam -c Control.bam -f BAM -g hs -n test -q 0.01.

#### Data quality

The alignment tool used the default quality control thresholds and provided only uniquely mapped reads as output in the BAM files. The MACS2 peak caller used a stringent cutoff of FDR 1% for detection of peaks. The following lists provide the counts of peak with FDR < 1% and peaks with Fold change > 5 for the comparison of shSETD1A samples against shGFP control samples.  
shSETD1A\_H3K4me3\_1: FDR peaks = 27901; fold change peaks = 22638  
shSETD1A\_H3K4me3\_2: FDR peaks = 31122; fold change peaks = 23695  
shSETD1A\_H3K4me3\_3: FDR peaks = 32300; fold change peaks = 24654

#### Software

XSQ colour space read files were subjected to analyses using LifeScope software package (Life Technologies), which provided a ChIP-seq module. LifeScope aligned color space read data to the hg19 human genome reference sequence to generate BAM files.  
BAM files were subjected to peak calling using MACS2, which generated .narrowPeak files.  
R/Bioconductor packages "ChIPseeker" and "clusterProfiler" were used to perform tertiary analyses.

## Flow Cytometry

### Plots

Confirm that:

- The axis labels state the marker and fluorochrome used (e.g. CD4-FITC).
- The axis scales are clearly visible. Include numbers along axes only for bottom left plot of group (a 'group' is an analysis of identical markers).
- All plots are contour plots with outliers or pseudocolor plots.
- A numerical value for number of cells or percentage (with statistics) is provided.

## Methodology

Sample preparation

Cells were harvested, washed twice in PBS, resuspended in 70% ethanol overnight, and then diluted in propidium iodide, RNase staining buffer (BD Pharmingen) and incubated for 15 min at 37°C.

Instrument

Flow cytometric analysis was performed on a FORTRESSA Cell analyzer (Cat No.647177).

Software

FloJo (V10) was used for flow cytometry data analysis.

Cell population abundance

Before cells were harvested, we confirmed all cells were viable. In the sorting, a viable cells gate were defined from FSC-A v SSC-A.

Gating strategy

A viable cell gate was defined first from FSC-A v SSC-A. Singlet gates were then defined on FSC-H v FSC-W. Finally, the DNA contents were quantified with propidium iodide Dye.

Tick this box to confirm that a figure exemplifying the gating strategy is provided in the Supplementary Information.
