# Supplementary material for: SETD1A protects from senescence through regulation of the mitotic gene expression program
Source: Nat Commun. 2019 Jun 28;10:2854. doi: 10.1038/s41467-019-10786-w (PMC6599037; doi:10.1038/s41467-019-10786-w)
Supplement: Supplementary file 1 — Supplementary_info_NEWv2 [file 41467_2019_10786_MOESM1_ESM.pdf]

## **Supplementary Information**

### **SETD1A protects from senescence through regulation of the mitotic gene expression program**

**Tajima et al.**

#### **Contents**

#### **Supplementary figures, Table and Legends**

Supplementary Fig. 1. SETD1A-KD induces senescence.

Supplementary Fig. 2. SETD1A-KD induces senescence independent of *p53* and *RB*.

Supplementary Fig. 3. SETD1A regulates mitosis, cell cycle and DNA damage response genes.

Supplementary Fig. 4. Direct visualization of correlation between dependence on genes that mediate sister chromatid cohesion and SETD1A dependence.

Supplementary Fig. 5. SETD1A-KD in *RB* and *p53* mutant cells induces p21 and p27.

Supplementary Fig. 6. SETD1A-KD cells escape senescence.

Supplementary Fig. 7. p21 and p27 expression in SETD1A-KD senescence escaping cells.

Supplementary Fig. 8. BTG2 contributes to SETD1A-mediated senescence.

Supplementary Table 1: Description of the leading-edge proteins related to the processes shown in Fig. S3B

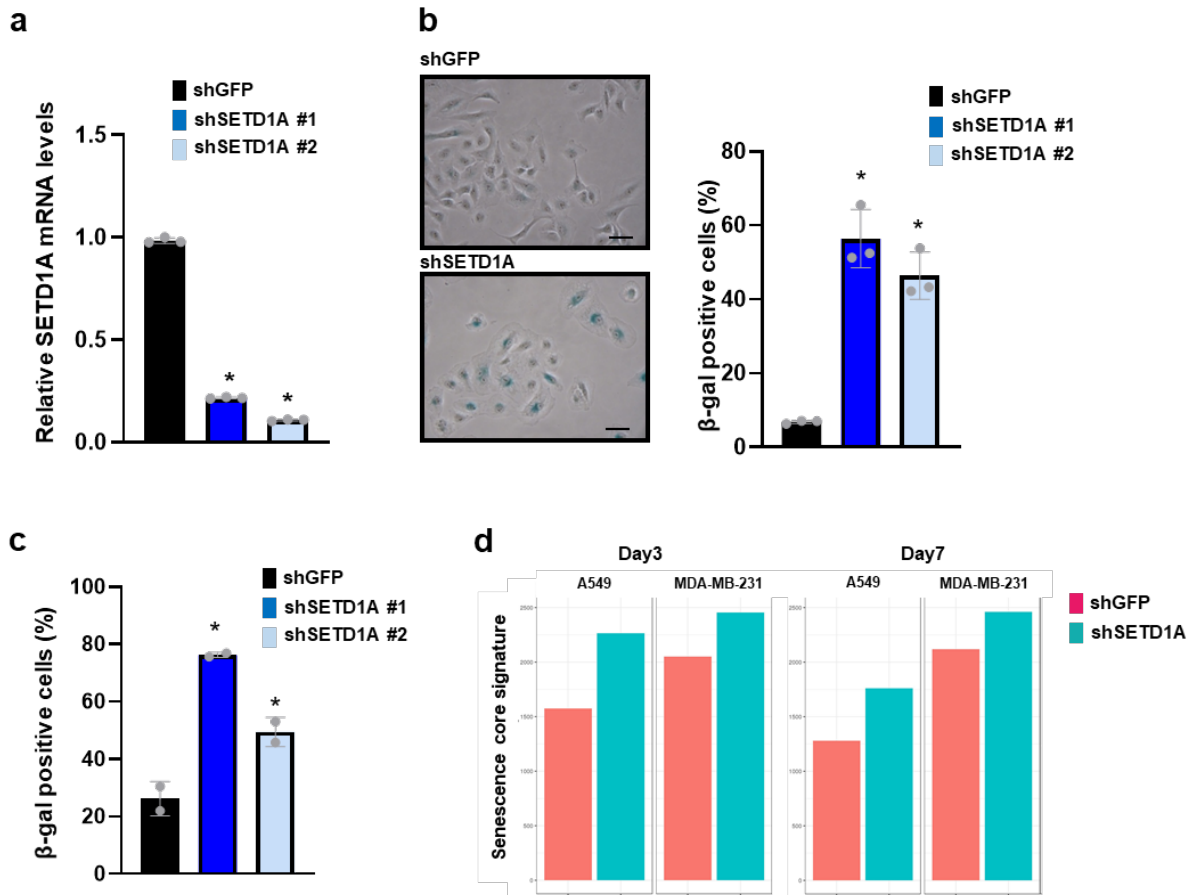

### Supplementary Fig. 1. SETD1A-KD induces senescence

**1a:** Bar graph shows the relative SETD1A mRNA levels in SETD1A-KD MDA-MB-231 cells compared with shGFP-cells. shSETD1A<sub>av</sub> represents the mean of cells infected with two different shSETD1A constructs. Data from three independent experiments are presented as Mean $\pm$ SD; \* $p$ <0.05 by two-tailed unpaired Student's t test. Source data are provided as a Source data file.

**1b:** Left: Images of  $\beta$ -gal stained control (shGFP) and SETD1A-KD (shSETD1A) A549 cells. The scale bar represents 50  $\mu$ m. Right: Bar graph shows quantification of  $\beta$ -gal positive cells in the shSETD1A and shGFP cultures. Data from three independent experiments are presented as Mean $\pm$ SD; \* $p$ <0.05 by two-tailed unpaired Student's t test. Source data are provided as a Source data file.

**1c:** Bar graph shows quantification of  $\beta$ -gal positive cells (Mean $\pm$ SD) in the shSETD1A and shGFP expressing immortalized non-tumorigenic MCF10A cells. Data from two independent experiments are presented as Mean $\pm$ SD; \* $p$ <0.05 by two-tailed unpaired Student's t test. Source data are provided as a Source data file.

**1d:** SETD1A-KD increases the 'senescence core signature'. Expression analysis of the 55 genes comprising the 'senescence core signature'<sup>22</sup> in RNA-Sequencing data derived from A549 and MDA-MB-231 cells after 3 and 7 days of SETD1A-KD. shGFP cells were used as control. Source data are provided as a Source Data file.



**a**

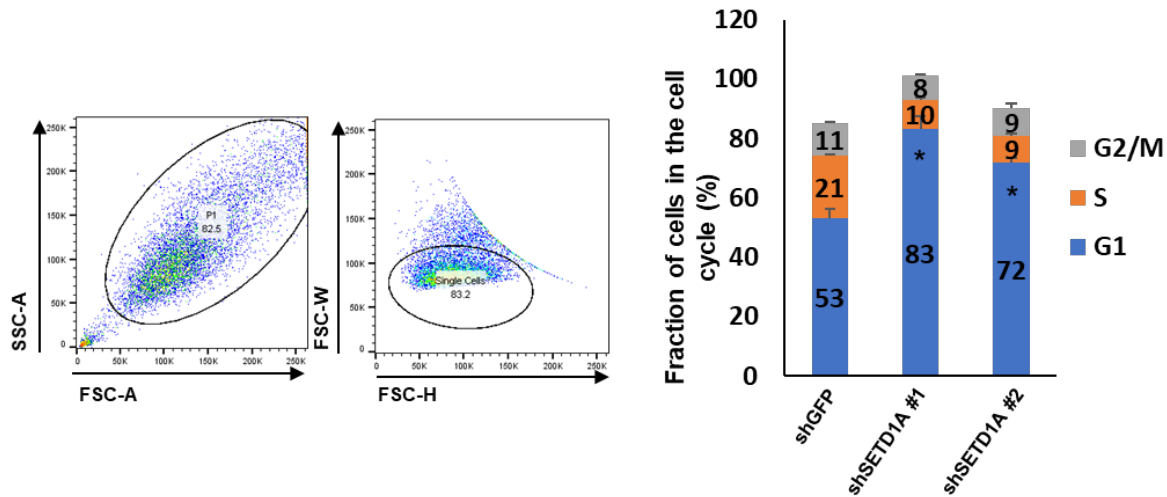

**b**

| cell line | TP53 | RB  | INK4A     | K-Ras | shGFP      | shSETD1A av | P value |
|-----------|------|-----|-----------|-------|------------|-------------|---------|
| HCT8      | Wt   | N/A | wt        | Wt    | 16.34±3.9  | 25.65±2.65  | <0.05   |
| H630      | Mut  | N/A | wt        | wt    | 1.00±0.32  | 42.61±6.46  | <0.05   |
| HCT116    | Wt   | wt  | insertion | mut   | 20.72±2.63 | 49.69±3.31  | <0.05   |
| DLD1      | Mut  | N/A | wt        | wt    | 0.45±0.16  | 4.51±0.89   | <0.05   |
| HCT15     | Mut  | wt  | wt        | mut   | 1.64±0.87  | 10.29±2.05  | <0.05   |
| SW620     | Mut  | wt  | wt        | mut   | 0.43±0.19  | 4.74±0.73   | <0.05   |
| HT29      | Mut  | wt  | wt        | wt    | 0.88±0.34  | 19.21±4.35  | <0.05   |

### Supplementary Fig. 2. SETD1A-KD induces senescence independent of p53 and RB

**2a:** Depletion of SETD1A induces cell cycle arrest. SETD1A expression was knocked down in MDA-MB-231 cells and the fraction of cells in each phase of the cell cycle was measured by FACS analysis. Left: Graphical account for FACS gating strategies for the figure on the right, which include gating for cell size and single cells. Right: Fraction of cells in G1, S and G2/M are shown. shGFP cells are shown as control. Data from three independent experiments are presented as Mean±SD; \*p<0.05 by two-tailed unpaired Student's t test. Source data are provided as a Source data file.

**2b:** Quantification of β-gal positive cells in multiple colon cancer cell lines infected with shSETD1A and shGFP. The mutational status of *p53*, *Rb*, *p16* and *K-Ras* in these cell lines is shown below. wt=wild type; mut=mutant. shSETD1Aav represents the mean of cells infected with two different shSETD1A constructs. Data from three independent experiments are presented as Mean±SD; \*p<0.05 by two-tailed unpaired Student's t test.

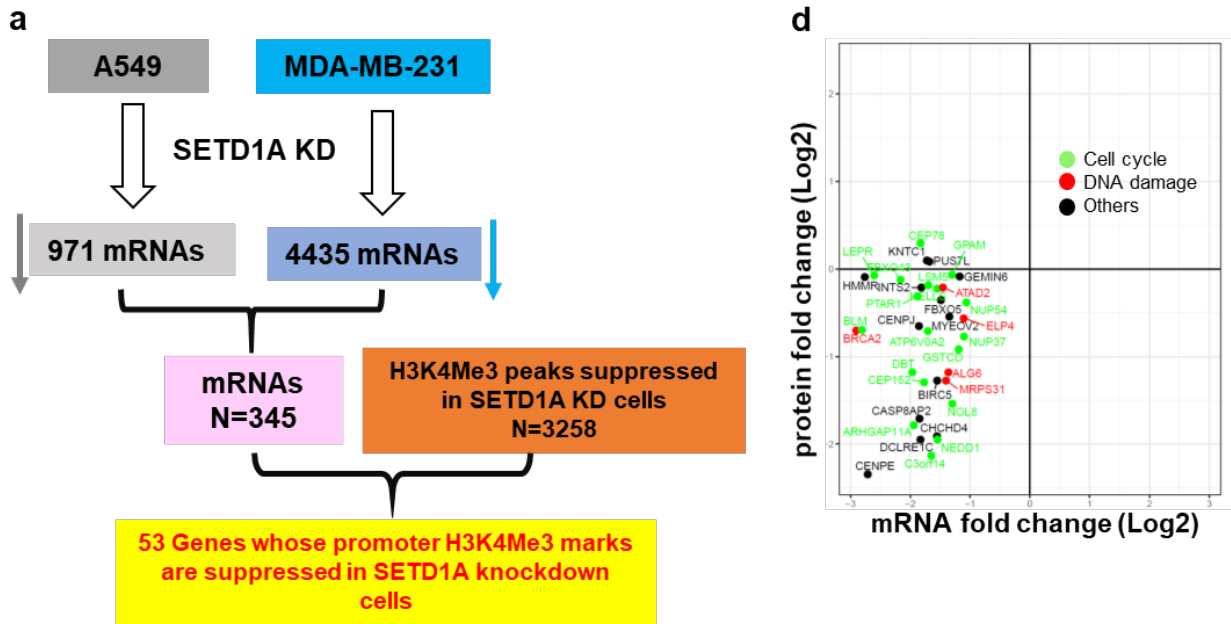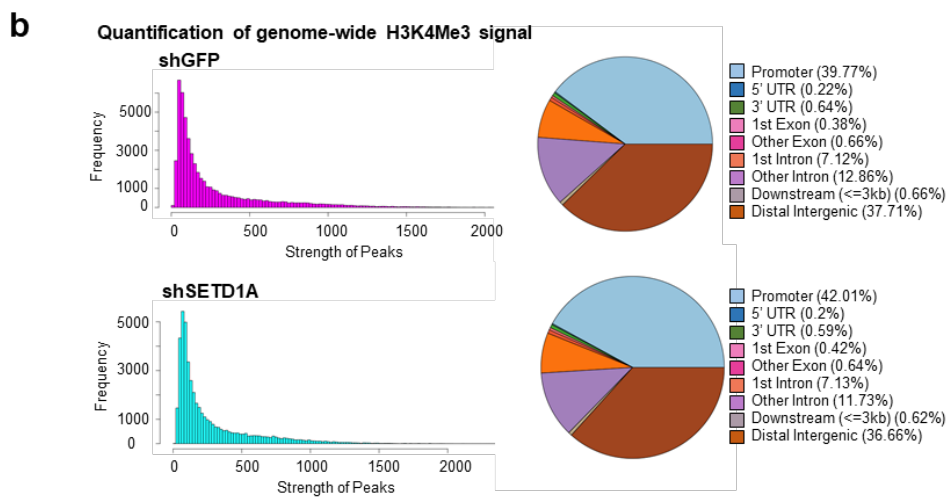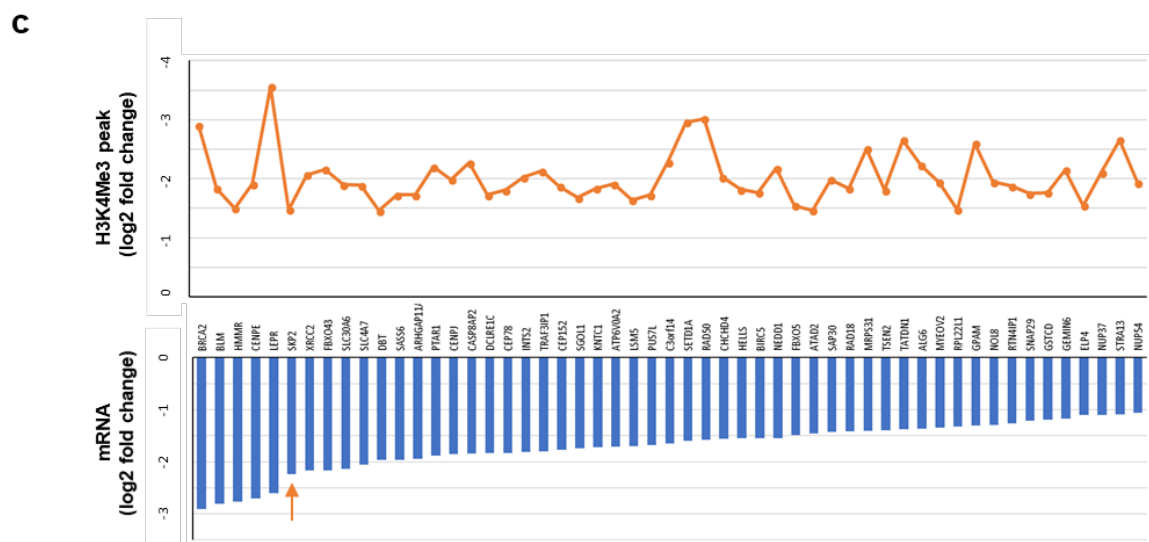

### **Supplementary Fig. 3. SETD1A regulates mitosis, cell cycle and DNA damage response genes**

**3a:** Schema showing the identification of 53 direct SETD1A targets. Transcriptome analysis of A549 and MDA-MB-231 cells following SETD1A-KD (with two different shSETD1A constructs) compared with shGFP expressing cells identifies 971 and 4435 mRNAs suppressed by 0.5-fold in SETD1A-depleted A549 and MDA-MB-231 cells, respectively. Comparison of these transcripts identifies 345 mRNAs which are commonly suppressed in both cell lines. ChIP-Sequencing analysis was used to identify H3K4Me3 peaks suppressed in MDA-MB-231 cells following SETD1A-KD. shGFP-infected cells were used as control. N=3 experimental replicates. Comparison of the H3K4Me3 marks significantly suppressed on 3258 promoters in SETD1A-KD cells with the 345 mRNAs commonly suppressed in both A549 and MDA-MB-231 cells identifies 53 direct targets.

**3b:** Quantification of the H3K4Me3 marks in both shGFP- and shSETD1A-MDA-MB-231 cells shows the percentage attributed to the various regions across the genome.

**3c:** Upper: Log2 fold change in the H3K4Me3 marks on the promoters of the 53 SETD1A target genes compared to control cells. Lower: Bar graph shows the log2 fold change in these 53 mRNAs compared with the shGFP control cells. SKP2 is marked with an arrow. Source data are provided as a Source Data file.

**3d:** The plots show the fold change in RNA and protein of the 53 SETD1A targets in SETD1A-KD cells. Of the 53 direct SETD1A mRNA targets identified, only 36 proteins were detected by mass spectrometry. Of those 36 proteins, 92% (N=33) were suppressed at the protein level. Gene sets are colored based on functional association and gene names are provided (cell cycle/mitosis=green; DNA damage response=red).

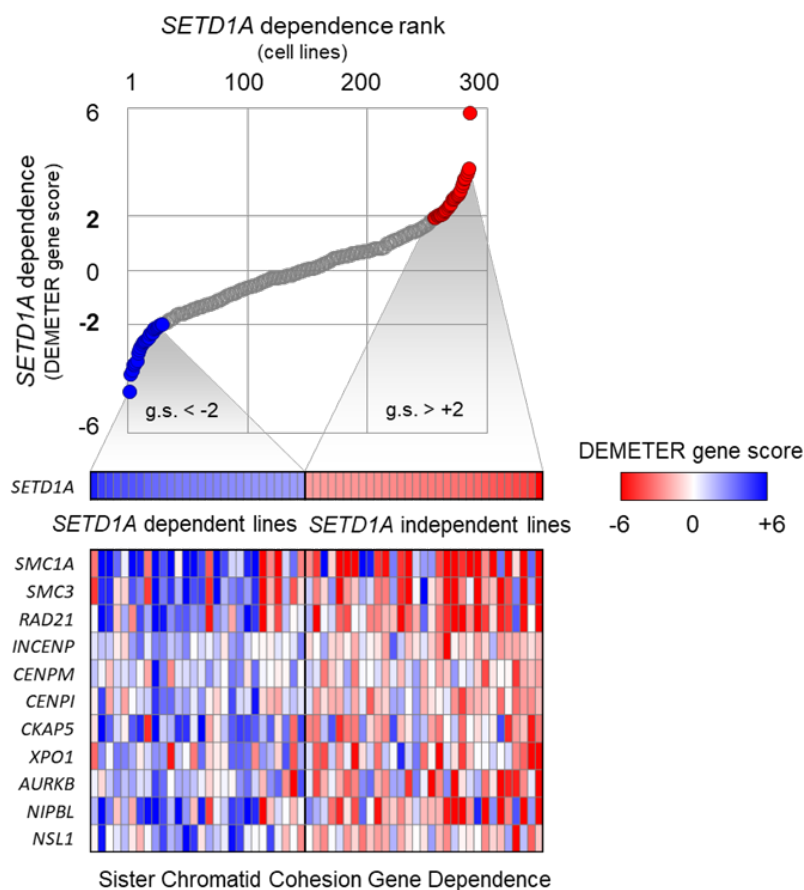

**b**

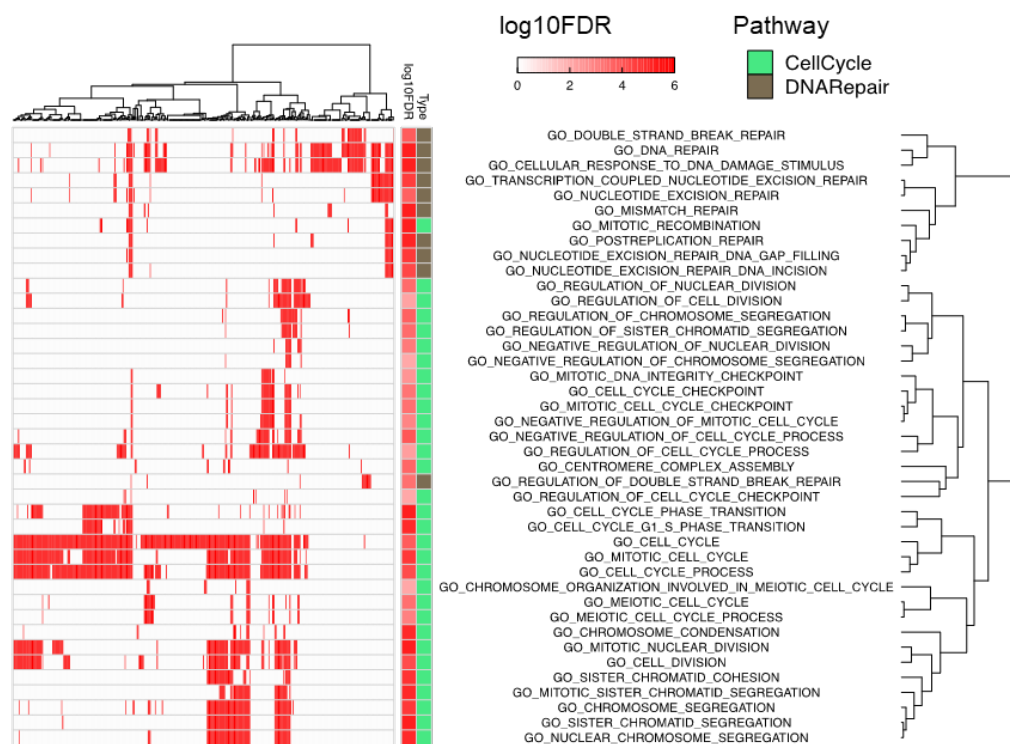

**Supplementary Fig. 4. Direct visualization of correlation between dependence on genes that mediate sister chromatid cohesion and SETD1A dependence**

**4a:** Upper: Achilles cell lines are ranked by SETD1A gene score, from most to least dependent. Gene score vs. rank is plotted for each line (gray), and SETD1A-dependent (blue, gene score < -2) and independent lines (red, gene score > +2) are highlighted. Lower: Dependence on genes involved in sister chromatid cohesion, identified by GO gene set enrichment (Fig. 3b), is shown. DEMETER gene scores range from blue (negative, most dependent) to red (positive, least dependent).

**4b:** Analysis of high-throughput quantitative proteome data available from a panel of 41 breast cancer cell lines shows that endogenous baseline SETD1A protein expression significantly correlates with pathways involving mitosis, cell cycle and DNA damage responses. The heatmap displays the hierarchical clustering of the leading-edge proteins related to the processes indicated; the key to the FDR values is also provided. The full set of gene enrichment results are provided in the Supplementary table 1.

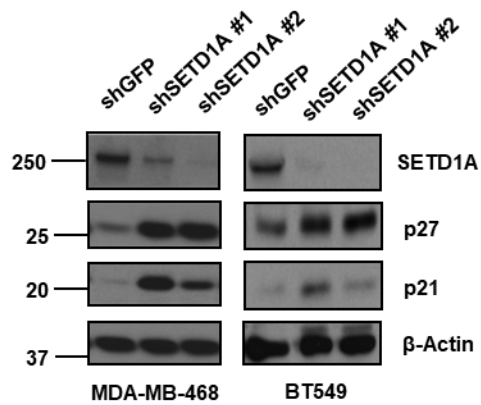

**Supplementary Fig. 5. SETD1A-KD in *RB* and *p53* mutant cells induces p21 and p27**  
 Western blot shows the induction of p21 and p27 proteins in SETD1A-KD MDA-MB-468 and BT549 cells, in which both *p53* and *RB* are inactivated.  $\beta$ -actin is shown as control. Source data are provided as a Source Data file.

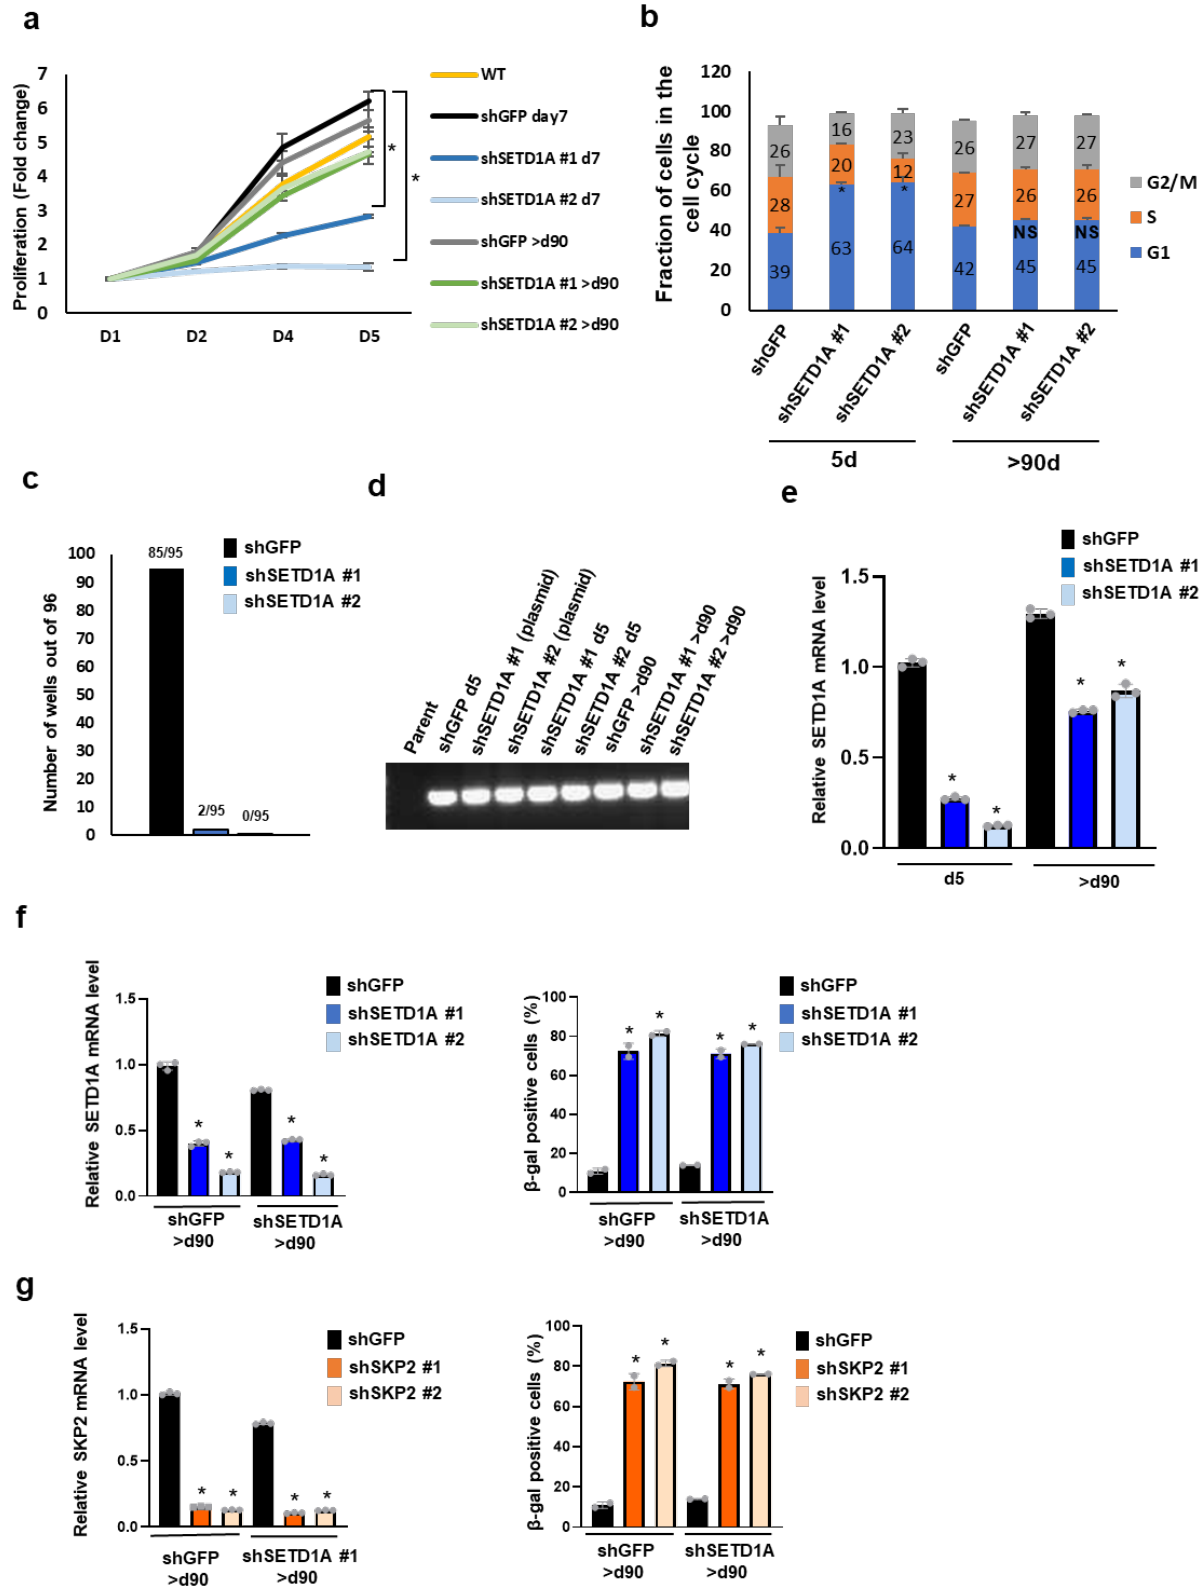

### **Supplementary Fig. 6. SETD1A-KD cells escape senescence**

**6a:** Proliferation of the SETD1A-KD senescent (5 days after infection) and senescence-escaping cultures (>90d) is shown. Data from three independent experiments are presented as Mean $\pm$ SD; \*p<0.05 by two-tailed unpaired Student's t test. Source data are provided as a Source Data file.

**6b:** Cell cycle analysis of SETD1A-KD cells maintained for >90 days in culture shows re-entry into the cell cycle (Escape) compared with the cell cycle arrest exhibited by SETD1A-KD senescent cells (5 days after SETD1A-KD). Quantification of cells at each stage of the cell cycle. Data from three independent experiments are presented as Mean $\pm$ SD; \*p<0.05 by two-tailed unpaired Student's t test. Source data are provided as a Source Data file.

**6c:** Individual SETD1A-KD (n=190; 95 individual cells from each of shSETD1A#1 and shSETD1A#2 cultures) and control cells (n=95) were seeded into 96-well plates and the number of colonies were scored. Source data are provided as a Source Data file.

**6d:** Genomic DNA from control (shGFP) and shSETD1A cells that are senescent or have escaped senescence was analyzed by PCR for the integration of the PLKO plasmid. Water was used as negative control and the plasmids were used as positive controls.

**6e:** Quantification of relative SETD1A mRNA levels (Mean $\pm$ SD) in ShSETD1A-KD senescent and escape cultures. shGFP cultures are shown as controls. Data from three independent experiments are presented as Mean $\pm$ SD; \*p<0.05 by two-tailed unpaired Student's t test. Source data are provided as a Source Data file.

**6f:** Knockdown of SETD1A in SETD1A-KD senescence escaping cells induces senescence. Left: Quantification of relative SETD1A mRNA levels (Mean $\pm$ SD) in shSETD1A-KD escape cells following knockdown of SETD1A with two different shSETD1A constructs. Matched shGFP cultures are shown as controls. Data from two independent experiments are presented as Mean $\pm$ SD; \*p<0.05 by two-tailed unpaired Student's t test. Right: Percentage of  $\beta$ -gal positive cells in each of the samples shown on the left. Data from two independent experiments are presented as Mean $\pm$ SD; \*p<0.05 by two-tailed unpaired Student's t test. Source data are provided as a Source Data file.

**6g:** Knockdown of SKP2 in the SETD1A-KD senescence-escaping cells induces senescence. Left: Quantification of relative SKP2 mRNA levels (Mean $\pm$ SD) in shSETD1A-KD escape cells following SKP2-KD with two different shSKP2 constructs. The matched shGFP cultures are shown as controls. Data from two to three independent experiments are presented as Mean $\pm$ SD; \*p<0.05 by two-tailed unpaired Student's t test. Source data are provided as a Source Data file. Right: Percentage of  $\beta$ -gal positive cells in each of the samples shown on the left. Data from two to three independent experiments are presented as Mean $\pm$ SD; \*p<0.05 by two-tailed unpaired Student's t test. Source data are provided as a Source Data file.

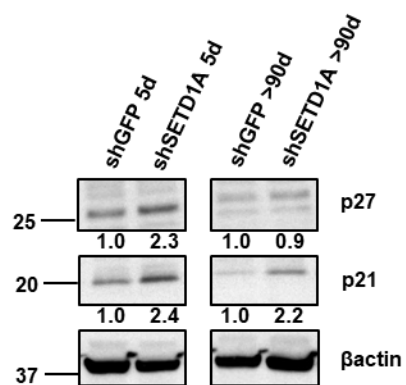

**Supplementary Fig. 7. p21 and p27 expression in SETD1A-KD senescence escaping cells.** Appropriate shGFP cells are shown as controls and  $\beta$ -actin is used as loading control. Quantification of the bands is provided below each blot. Source data are provided as a Source Data file.

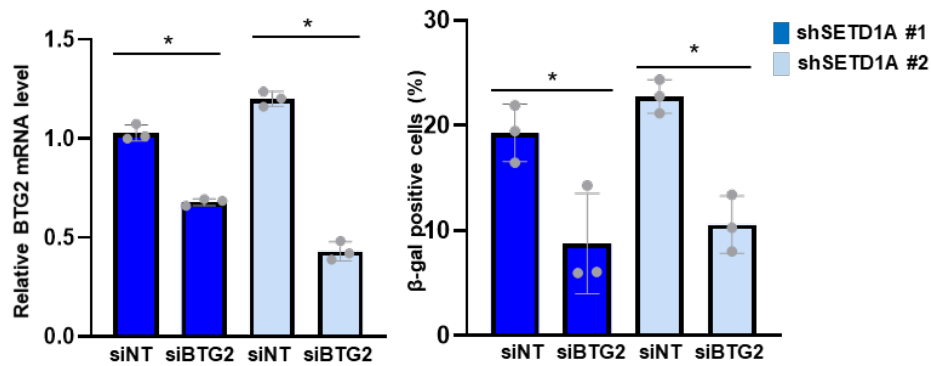

### Supplementary Fig. 8. BTG2 contributes to SETD1A-mediated senescence

Knockdown of BTG2 rescues the senescence phenotype. SETD1A expression was knocked down in cells following the suppression of BTG2 (using siRNAs) and the β-Gal positive cells were enumerated. Non-targeting siRNA was used as control. Left: Bar graph shows the relative BTG2 mRNA levels in SETD1A-KD cells (performed with two different shRNAs against SETD1A) transfected with siRNAs against BTG2. Data from three independent experiments are presented as Mean±SD; \*p<0.05 by two-tailed unpaired Student's t test. Right: Bar graph shows the percentage of β-gal positive cells in the SETD1A-KD cells shown on the left. Data from three independent experiments are presented as Mean±SD; \*p<0.05 by two-tailed unpaired Student's t test. Source data are provided as a Source Data file.

**Supplementary Table 1**

Description of the leading-edge proteins related to the processes shown in Fig. S3B

| #  | Signatures                                                 | GO         |
|----|------------------------------------------------------------|------------|
| 1  | Centrosome                                                 | GO:0005813 |
| 2  | Nucleoplasm                                                | GO:0005654 |
| 3  | Cell division                                              | GO:0051301 |
| 4  | G2/M transition of mitotic cell cycle                      | GO:0000086 |
| 5  | Condensed chromosome kinetochore                           | GO:0000777 |
| 6  | Mitotic nuclear division                                   | GO:0007067 |
| 7  | Strand displacement                                        | GO:0000732 |
| 8  | DNA synthesis involved in DNA repair                       | GO:0000731 |
| 9  | Sister chromatid cohesion                                  | GO:0007062 |
| 10 | Centriole                                                  | GO:0005814 |
| 11 | Chromosome, centromeric region                             | GO:0000775 |
| 12 | Chromosome                                                 | GO:0005694 |
| 13 | Chromosome organization                                    | GO:0051276 |
| 14 | Poly A RNA binding                                         | GO:0003723 |
| 15 | RNA binding                                                | GO:0003723 |
| 16 | Sister chromatid segregation                               | GO:0000819 |
| 17 | Nuclear chromosome segregation                             | GO:0098813 |
| 18 | Negative regulation of nitrogen compound metabolic process | GO:0051172 |
| 19 | Cell cycle process                                         | GO:0022402 |
| 20 | Double strand break repair                                 | GO:0006302 |
| 21 | DNA repair                                                 | GO:0045021 |
| 22 | Cellular response to DNA damage stimulus                   | GO:2001020 |
| 23 | Transcription coupled nucleotide excision repair           | GO:0006283 |
| 24 | Nucleotide excision repair                                 | GO:0006289 |
| 25 | Mitotic recombination                                      | GO:0006312 |
| 26 | Post replication repair                                    | GO:0006301 |
| 27 | Nucleotide excision repair DNA gap filling                 | GO:0006297 |
| 28 | Nucleotide excision repair DNA incision                    | GO:0033683 |
| 29 | Regulation of nuclear division                             | GO:0051783 |
| 30 | Regulation of cell division                                | GO:0051302 |
| 31 | Regulation of chromosome segregation                       | GO:0051983 |
| 32 | Regulation of sister chromatid segregation                 | GO:0033045 |

|    |                                                        |            |
|----|--------------------------------------------------------|------------|
| 33 | Negative regulation of chromosome segregation          | GO:0051985 |
| 34 | Mitotic DNA integrity checkpoint                       | GO:0044774 |
| 35 | Cell cycle check point                                 | GO:0000075 |
| 36 | Negative regulation of mitotic cell cycle              | GO:0045930 |
| 37 | Negative regulation of cell cycle process              | GO:0010948 |
| 38 | Regulation of cell cycle process                       | GO:0010564 |
| 39 | Centromere complex assembly                            | GO:0034508 |
| 40 | Regulation of double strand break repair               | GO:2000779 |
| 41 | Regulation of cell cycle check point                   | GO:1901976 |
| 42 | Cell cycle phase transition                            | GO:0044770 |
| 43 | Cell cycle G1/S phase transition                       | GO:0044843 |
| 44 | Cell cycle                                             | GO:0007049 |
| 45 | Mitotic cell cycle                                     | GO:0000278 |
| 46 | Cell cycle process                                     | GO:0022402 |
| 47 | Chromosome organization involved in meiotic cell cycle | GO:0070192 |
| 48 | Meiotic cell cycle                                     | GO:0051321 |
| 49 | Meiotic cell cycle process                             | GO:1903046 |
| 50 | Chromosome condensation                                | GO:0030261 |
| 51 | Mitotic nuclear division                               | GO:0140014 |
| 52 | Cell division                                          | GO:0051301 |
| 53 | Sister chromatid cohesion                              | GO:0051177 |
| 54 | Mitotic sister chromatid segregation                   | GO:0000070 |
| 55 | Chromosomal segregation                                | GO:0007059 |
| 56 | Sister chromatid segregation                           | GO:0000819 |
| 57 | Nuclear chromosome segregation                         | GO:0098813 |
